1 **Full Title: HLA Type and Chronic Viral Infection Impact Peripheral T-cell Receptor Sharing**  
2 **Between Unrelated Individuals**

3

4 Short Title: Impacts of HLA Type and Viral Exposure on T-cell Receptor Sharing

5

6 Sarah A. Johnson<sup>1</sup>, Spencer L. Seale<sup>1</sup>, Rachel M. Gittelman<sup>1</sup>, Julie A. Rytlewski<sup>1</sup>, Harlan S.  
7 Robins<sup>1</sup>, Paul A. Fields<sup>1,\*</sup>

8 <sup>1</sup> Adaptive Biotechnologies, Seattle, WA

9 \* Corresponding author; email: pfields [at] adaptivebiotech.com

10

11

12

13 **ABSTRACT**

14 The human adaptive immune system must generate extraordinary diversity to be able to  
15 respond to all possible pathogens. The T-cell repertoire derives this high diversity through  
16 somatic recombination of the T-cell receptor (TCR) locus, a random process that results in  
17 repertoires that are largely private to each individual. However, certain factors such as low  
18 junctional diversity, thymic selection, and T-cell proliferation upon antigen exposure can affect  
19 TCR sharing among individuals. By immunosequencing the TCR $\beta$  variable region of 426 healthy  
20 individuals, we find that fewer than 1% of TCR $\beta$  clones are shared between individuals on  
21 average, consistent with largely private TCR $\beta$  repertoires. However, we detect a significant  
22 correlation between increased HLA allele sharing and increased number of shared TCR $\beta$  clones,  
23 with each additional shared HLA allele contributing to an increase in  $\sim 0.01\%$  of the total TCR $\beta$   
24 clones being shared, supporting a key role for HLA type in shaping the immune repertoire.  
25 Surprisingly, we find that shared antigen exposure to CMV leads to fewer shared TCR $\beta$  clones,  
26 even after controlling for HLA, indicative of a largely private response to major viral antigenic  
27 exposure. Consistent with this hypothesis, we find that increased age is correlated with  
28 decreased overall TCR $\beta$  clone sharing, indicating that the pattern of private TCR $\beta$  clonal  
29 expansion is a general feature of the T-cell response to other infectious antigens. All of these  
30 factors contribute to shaping the TCR $\beta$  repertoire, and understanding their interplay has  
31 important implications for the use of T cells for therapeutics and diagnostics.

32

### 33 INTRODUCTION

34 T cells make up a key component of the adaptive immune response and allow the body to  
35 respond to the diverse range of pathogens it may encounter. The adaptive immune system of a  
36 healthy adult includes up to  $10^{15}$  highly diverse T cells (1,2). Antigen recognition depends on  
37 both T-cell specificity and the molecular complex presenting the antigen. Foreign antigens are  
38 first processed and presented by an individual's major histocompatibility complex (MHC). T cells  
39 that encounter their specific cognate MHC-presented antigen will bind and proliferate, leading  
40 to an immune response. The vast diversity of possible T-cell receptors (TCR) is generated by the  
41 random recombination of genes in the third complimentary determining regions (CDR3) within  
42 a TCR's  $\alpha$  and  $\beta$  chains. In the recombination process of the  $\beta$  chain, loci of the variable (V),  
43 diversity (D), and joining (J) regions are randomly spliced together with non-templated  
44 insertions and deletions occurring between each junction, resulting in up to  $10^{11}$  possible  
45 sequences (3,4). Recombination of the TCR $\alpha$  chain includes only V and J gene segments,  
46 resulting in fewer possible rearrangements and making the TCR $\beta$  chain a more suitable target  
47 for identifying unique T cells, and thus the focus of this paper. T cells mature in the thymus,  
48 where their affinity to MHC molecules is tested prior to subsequent release into the periphery.  
49 Successful antigen recognition requires T cells to effectively recognize the body's MHC and  
50 coordinate a response. However, excessive avidity to the MHC causes T cells to incorrectly  
51 identify host cells as foreign targets and may result in autoimmunity. Therefore, in healthy  
52 individuals self-immunogenic T cells are targeted for apoptosis, while those yielding mild  
53 affinity to the MHC are released into the periphery for circulation (5). As the MHC is encoded by  
54 highly polymorphic human leukocyte antigen (HLA) loci in humans, this process of thymic  
55 selection occurs within the context of an individual's HLA type. As a result, VDJ recombination,  
56 HLA restriction, and antigen exposure collectively contribute to a largely private TCR $\beta$   
57 repertoire.

58 Despite the large space of potential TCR $\beta$  rearrangements, the existence of public clones found  
59 in two or more individuals has been well characterized, and occurs more frequently than would  
60 be expected by chance (6–8). Public TCR $\beta$  clones can arise through either convergent  
61 recombination - due to highly probable rearrangements, or convergent selection - due to  
62 proliferation after common antigen exposure. Biases in VDJ recombination and junctional indel  
63 patterns have been computationally modeled, and suggest that CDR3 sequences that more  
64 closely resemble the germline-encoded nucleotide sequence are more likely to occur and thus  
65 be shared between individuals (9,10). Previous studies have identified publicly expanded,  
66 antigen-specific T cells to a variety of pathogens including CMV and SARS-CoV-2, among others  
67 (11–14), supporting convergent selection as a mechanism for generating public clones.  
68 Together, both of these processes contribute to the existence of public clones, but much  
69 remains to be discovered about how factors such as additional antigen exposure and HLA type  
70 modify them.

71 Understanding the forces underlying the inherent diversity of the TCR $\beta$  repertoire of an  
72 individual and the public sharing of TCR $\beta$  clones is of great clinical interest. Decreased diversity  
73 of TCR $\beta$  clones in older individuals has been associated with reduced immune function (15).

74 Similarly, increased evolutionary divergence of HLA class I alleles has been correlated with  
75 better responses to immune checkpoint inhibitors in cancer patients (16). Public TCRβs that  
76 respond to specific antigens have the potential to be used diagnostically to identify an  
77 individual's antigen exposure (11–13). Likewise, antigen-specific clones have demonstrated  
78 therapeutic potential as next-generation CAR-T cells (17,18). Additionally, HLA-restriction of  
79 TCRβs is clinically relevant to evaluating histocompatibility for the purposes of bone-marrow  
80 and solid organ transplants (19,20). Continued development of such immunological and  
81 medical advancements depends on fully understanding the determinants that shape public  
82 versus private TCRβs.

83 To explore the influence of biological and environmental forces on the dynamics of TCRβ clone  
84 sharing, we utilized a published set of TCRβ repertoires from 426 healthy human subjects  
85 (8,11). We assessed the role of HLA zygosity, HLA allele sharing, CMV exposure, and age in  
86 shaping the immune repertoire and the sharing of TCRβ clones between individuals. By  
87 analyzing both the highest-frequency and single-copy TCRβ clones, we identified a consistent  
88 positive association between numbers of shared HLA alleles and TCRβ clones. Additionally, we  
89 found that CMV exposure and increased age result in more private TCRβ repertoires, in  
90 particular among high frequency clones. Our results demonstrate the impact of both age and  
91 HLA type on TCRβ clone generation and maturation, influencing the sharing of low frequency  
92 clones. In contrast, our results indicate that infectious antigen exposure leads to the expansion  
93 of largely private and HLA-restricted TCRβ clones, and that it impacts the sharing of high  
94 frequency clones.

95

## 96 **RESULTS**

### 97 **Determinants of TCRβ Repertoire Diversity in Healthy Individuals**

98 We first investigated how HLA type influences diversity of the TCRβ repertoire. The divergent  
99 allele hypothesis suggests that greater diversity of HLA alleles leads to a greater diversity of  
100 presented peptides (21,22), and thus potentially greater diversity of the TCRβ repertoire. To  
101 address this question, we utilized previously published TCRβ repertoire data from over 600  
102 individuals with known HLA type and CMV serostatus. We restricted analysis to individuals with  
103 full 4-digit resolution at 6 HLA loci (HLA-A, HLA-B, HLA-C, HLA-DRB1, HLA-DQB1, HLA-DPA1), for  
104 which > 90% of individuals in the cohort have a resolved type. To control for any technical  
105 variation due differences in T-cell fraction or input material, we additionally restricted analysis  
106 to only those 426 subjects with greater than 200,000 total T cells. We determined the zygosity  
107 of these individuals at the included HLA loci and quantified repertoire diversity with two  
108 metrics: richness and clonality. The richness of each repertoire was calculated as the number of  
109 unique TCRβ nucleotide rearrangements after computationally downsampling all repertoires to  
110 200,000 productive templates. Simpson clonality was also calculated for each repertoire to  
111 assess the dominance of high frequency clones in the repertoire. Within this cohort, 44%  
112 of individuals are homozygous at the HLA-DPA1 loci, and heterozygous at all other loci (S1 Fig).

113

114 In contrast to our expectations, there was not a significant relationship between the number of  
115 homozygous class I or class II HLA alleles and the richness or clonality of an individual's  
116 repertoire in this cohort (Figs 1A, 1B, S2A, S2B). Similarly, there is not an overall correlation  
117 across all 6 included loci (S2C, S2D Figs). This suggests that, in addition to not influencing the  
118 overall richness, HLA zygosity does not influence the extent of oligo-clonal dominance in the  
119 repertoire.

120

121 We additionally examined the influence of age and CMV exposure on the diversity of the TCR $\beta$   
122 repertoire. Consistent with prior studies, we found that CMV+ individuals have increased  
123 clonality and decreased repertoire richness, indicating a more focused repertoire post-viral  
124 exposure (S3A, S3B Figs), and also observed a negative correlation between age and repertoire  
125 diversity (S3C, S3D Figs) (23–25). Within our cohort, we did not see a correlation between  
126 overall HLA zygosity and diversity among either CMV+ or CMV- individuals (S2E and S2F Figs).  
127 Taken together, this data demonstrates that the diversity of a person's TCR $\beta$  repertoire is  
128 largely independent of HLA zygosity and may be driven more by age and exposure to antigens.

129

### 130 **Healthy Individuals with More Shared HLA Alleles Share More TCR $\beta$ Clones**

131 While HLA zygosity does not affect the overall diversity of a TCR $\beta$  repertoire, positive thymic  
132 selection does select for TCR $\beta$  clones with affinity to an individual's specific set of HLA alleles  
133 (26). We thus hypothesized that shared HLA alleles between unrelated individuals may  
134 contribute to the sharing of unique clones. The number of shared clones between each pairwise  
135 combination of repertoires was determined by comparing TCR $\beta$  clones by their functional  
136 identity (the V gene family, CDR3 amino acid sequence, and J gene). This allows clone sharing to  
137 be detected when different individuals generate TCR $\beta$  clones with the same specificity but  
138 distinct nucleotide sequences through VDJ recombination. To be considered a shared TCR $\beta$   
139 clone, an exact match was required. The HLA allele sharing between individuals was  
140 determined regardless of HLA zygosity, where two individuals homozygous for the same HLA  
141 allele were considered to share two alleles.

142 We saw a significant correlation between the number of HLA alleles shared between two  
143 individuals and the number of shared unique downsampled TCR $\beta$  clones ( $p < 0.001$ , Mantel  
144 test, Fig 2A). Using a linear mixed-effects model, individuals with no HLA alleles in common  
145 shared on average 1,884 of their 200,000 downsampled clones (0.94%), while each additional  
146 shared HLA allele resulted in an increase of 14 shared clones. This suggests a baseline  
147 population of public clones found across all subjects regardless of HLA type, consistent with the  
148 existence of bystander public clones with high generation probability, in addition to a subset of  
149 clones that are shared based on HLA type (10,27). While there was a similar relationship  
150 between shared alleles and shared TCR $\beta$  clones within both class I and class II alleles, this  
151 correlation was slightly stronger for HLAII alleles (Figs 2B and 2C). This is consistent with CD4+ T  
152 cells, which bind class II alleles, making up a greater fraction of the repertoire than CD8+ T cells,  
153 which bind class I alleles (28).

## 154 **Sharing of the Low Frequency and Expanded TCR $\beta$ Clones is Impacted by HLA Type**

155 We next wanted to characterize the extent to which the number of shared HLA alleles relates to  
156 the sharing of both expanded and low frequency clones. While immunosequencing cannot  
157 distinguish naïve vs. memory T cells, we hypothesized that many singletons (TCR $\beta$  clones seen  
158 once in a sample) correspond to naïve clones, while the highest frequency rearrangements  
159 correspond to clones that have likely expanded in response to prior antigen exposure. To  
160 characterize the singleton repertoire, we randomly selected 80,000 singletons from the  
161 repertoire of each individual. Singleton clones were selected by nucleotide sequence to best  
162 capture rearrangements that were present once in the full repertoire of an individual, but  
163 compared between individuals using functional identity. While this process may exclude highly-  
164 probable rearrangements that are present multiple times in an individual (29), it captures the  
165 lowest frequency clones in a repertoire. Similar to what we observed when analyzing the  
166 downsampled repertoires, there was a significant correlation between the number of shared  
167 HLA alleles and number of shared singletons between individuals ( $p < 0.001$ , Mantel test, Fig  
168 2D). Notably, individuals with no shared alleles still shared on average 613 of 80,000 (0.77%)  
169 singletons. Since T cells that are present once in a repertoire are less likely to have encountered  
170 antigens, this overlap of singletons between individuals may be attributed to convergent  
171 recombination of frequently generated TCR $\beta$  rearrangements. Each shared HLA allele was  
172 correlated with an increase of 6 shared singletons, consistent with a role for HLA type in the  
173 maturation of the TCR $\beta$  repertoire. However, even when individuals shared 10 HLA alleles, their  
174 repertoires were still largely private, sharing on average 660 of 80,000 singletons, still  $< 1\%$ .  
175 Thus, while HLA type plays an important role in the maturation of T cells, the random VDJ  
176 somatic recombination results in most individuals having a highly private TCR $\beta$  repertoire.

177 To characterize the expanded repertoire of each subject, we selected the top 5,000 unique  
178 clones by frequency from each full repertoire prior to downsampling. As chronic infections such  
179 as CMV increase the clonality of TCR $\beta$  repertoires (11,30) (S3A Fig), we selected a common  
180 number of rearrangements to mitigate the effect of a few largely expanded clones. Similar to  
181 the results among the downsampled and singleton repertoires, there was a significant  
182 relationship between the number of HLA alleles shared and number of high-frequency clones  
183 shared ( $p < 0.001$ , Mantel test, Fig 2E). On average, individuals that shared no HLA alleles  
184 shared  $\sim 34$  of their top 5,000 clones (0.68%), with each additional shared allele leading to an  
185 additional 1.3 shared clones. Together, these findings suggest that while the HLA type of an  
186 individual does not impact the overall diversity of their TCR $\beta$  repertoire, HLA type does have a  
187 small but significant impact on the specific TCR $\beta$  clones selected for maturation, as well as  
188 those that expand in response to antigens.

## 189 **Shared HLA Alleles Increases Sharing of Rare TCR $\beta$ Clones**

190 Given the role of convergent recombination in influencing TCR $\beta$  clone sharing, we next sought  
191 to assess whether HLA type influences sharing of clones with high-generation probability  
192 differently than that of those with lower generation probability. To do this, we determined the

193 generation probabilities of all TCR $\beta$  rearrangements using OLGA (9), which correlated strongly  
194 with CDR3 length and the number of indels (S4A-C Figs). We established a cutoff point ( $P_{\text{gen}} =$   
195  $1.66\text{e-}09$ ) to distinguish rare from common TCR $\beta$  clones by finding the intersection point of  
196 generation probabilities between public TCR $\beta$  clones that occurred in more than one subject  
197 and private TCR $\beta$  clones found in only one subject (Fig 3A, S4D Fig). Each TCR $\beta$  clone was thus  
198 classified as “rare,” with generation probabilities lower than this cutoff, or “common”  
199 otherwise. Sharing of each subset of clones between individuals was examined in both the  
200 downsampled and singleton repertoires. While sharing of both common and rare clones were  
201 significantly correlated with increased sharing of HLA alleles, the relationship was stronger  
202 among rare clones (Mantel rho 0.28) compared to common clones (Mantel rho 0.12) ( $p < 0.001$ ,  
203 Mantel test, Figs 3B and 3C). As rare TCR $\beta$  clones are those with rearrangements not commonly  
204 generated during VDJ recombination, these results suggest that their selection for maturation  
205 may be modulated by HLA genotype.

206 Interestingly, and in contrast to the downsampled repertoires, the singleton TCR $\beta$  repertoires  
207 exhibited similar positive associations between HLA allele sharing and both shared common  
208 (Mantel rho = 0.14) and rare (Mantel rho = 0.18) clones ( $p < 0.001$ , Mantel test, Figs 3D and 3E).  
209 These results suggest that HLA allele sharing affects both rare and common TCR $\beta$  clone sharing,  
210 but the degree of impact depends on the frequencies of those clones within an individual  
211 repertoire. TCR $\beta$  repertoire frequency is largely determined by antigen exposure, suggesting  
212 that expansion of rare clones may increase clone sharing among individuals with matched HLA  
213 types, though these clones only make up a small proportion of the overall repertoire.

#### 214 **CMV Negative Individuals Share More TCR $\beta$ Clones Than CMV Positive Individuals**

215 Our prior analyses focused on clone sharing independent of antigen exposure. We next sought  
216 to determine whether common viral antigenic exposure would lead to differences in clone  
217 sharing. We focused our analysis on CMV, as our analysis cohort was split roughly equally  
218 between CMV+ (subjects with past CMV infection) and CMV- individuals (11). We hypothesized  
219 that CMV+ individuals may share more clones than CMV- individuals. Surprisingly, we observed  
220 the opposite, with CMV- individuals sharing more downsampled TCR $\beta$  clones than CMV+  
221 subjects (Fig 4A), and significantly more clones than a permuted null distribution (S5 Fig;  
222 permuted  $P = 0.002$ ). The pattern of increased clone sharing between CMV- individuals  
223 persisted among both rare and common TCR $\beta$  clones, regardless of the number of HLA clones  
224 shared (S6A and S6B Figs). This suggests that CMV infection leads to significantly fewer shared  
225 clones between individuals.

226 CMV+ individuals have significantly higher clonality and lower richness than CMV- individuals  
227 (S3A and S3B Figs), effectively decreasing the number of unique clones that could be shared in  
228 CMV+ individuals (25). To account for this disparity in diversity, we again looked at clone  
229 sharing among the top 5,000 unique TCR $\beta$  rearrangements. There was also greater sharing of  
230 top TCR $\beta$  clones between CMV- individuals compared to CMV+ individuals (Fig 4B) and  
231 compared to the null (permuted  $P = 0.002$ ). This suggests that TCR $\beta$  repertoires become more

232 private after CMV antigen exposure, likely through the expansion of mostly private clones.  
233 Notably, this trend is consistent independent of shared HLA alleles (Fig 4C). Despite the overall  
234 decrease in shared TCR $\beta$  clones compared to CMV- individuals, CMV+ individuals showed  
235 significantly greater enrichment in their top 5,000 clones of CMV-associated TCR $\beta$  clones, as  
236 identified in Emerson et al. (Fig 4D,  $P < 2.2e-16$ , Unpaired Wilcoxon test). This suggests that while  
237 some public clones expand based on common viral antigen exposure, most of the expanded  
238 antigen-specific clones are private to a given repertoire.

239 In contrast to the most expanded clones, individuals shared a comparable number of singletons  
240 regardless of CMV status (Fig 4E). We did observe a significant enrichment of CMV-associated  
241 clones among the singletons of CMV+ individuals (Fig 4D,  $P < 2.2e-16$ , Unpaired Wilcoxon test),  
242 which may reflect some antigen exposed TCR $\beta$  clones among the singletons. When stratified by  
243 shared HLA alleles, CMV+ individuals share slightly more singletons than CMV- individuals (Fig  
244 4F), which can likely be explained by differences in age between CMV+ and CMV- individuals.  
245 We observed that CMV+ individuals in this cohort tend to be older than CMV- individuals (S3E  
246 Fig), and that older individuals had a greater proportion of common singletons than younger  
247 individuals (S7C and S8C Figs), making increased singleton sharing between CMV+ individuals  
248 consistent with the less diverse and more public singleton repertoires of older individuals (15).

#### 249 **TCR $\beta$ Repertoires Become Increasingly Private with Age**

250 Given the association between CMV and TCR $\beta$  clone sharing, we hypothesized that antigen  
251 exposure in general may lead to more private TCR $\beta$  repertoires. Older individuals are likely to  
252 have encountered more antigens over the course of their life, consistent with more clonal  
253 repertoires in older subjects (S3F Fig) (31). To examine whether age, as a proxy for antigen  
254 exposure, is a contributing factor in clone sharing, we divided individuals into above/equal to or  
255 below the median age (42 years) and compared TCR $\beta$  clone sharing within both the  
256 downsampled and the singleton repertoires. We found that older individuals shared fewer  
257 downsampled clones than younger individuals (median 1842 vs. 2136) (Fig 5A), and significantly  
258 fewer clones than the null (permuted  $P = 0.002$ ). Since CMV+ individuals tend to be older (S3E  
259 Fig), we also looked at the impact of age within CMV+ and CMV- individuals. Older individuals  
260 continued to share fewer clones independent of CMV status (Fig 5B). Additionally, clone sharing  
261 between younger individuals continued to be greater than clone sharing between older  
262 individuals regardless of the number of HLA alleles shared (Fig 5C). This suggests that exposure  
263 to more pathogenic antigens, such as CMV, results in expansion of a set of largely private TCR $\beta$   
264 clones.

265 To evaluate whether age impacts shared clones differently based on their generative  
266 probability, we again split up clonotypes into rare and common subsets using the previously  
267 defined cutoff (Fig 3A, S4D Fig). Older individuals shared fewer common clones than younger  
268 individuals (median 1707 vs. 1989) (Fig 5D), and significantly fewer common clones than the  
269 null (permuted  $P = 0.002$ ). Older individuals additionally shared fewer rare clones than younger  
270 individuals (median 74 vs 79) (Fig 5E), although not significantly fewer rare clones than the null

271 (permuted  $P > 0.05$ ). This demonstrates that older individuals share fewer TCR $\beta$  clones  
272 independent of generation probability.

### 273 **Older Individuals Share More Singletons Than Younger Individuals**

274 Next, we examined how age shapes the sharing of singletons. In contrast to the downsampled  
275 repertoire, older individuals shared more singletons than younger individuals (median 634 vs  
276 617) (Fig 6A), and significantly more clones than the null (permuted  $P < 0.05$ ). This trend held  
277 true regardless of the number of HLA alleles shared (Fig 6B). Additionally, older individuals  
278 shared more singletons in both the rare and the common subsets (Figs 6C and 6D), and  
279 significantly more rare and common singletons than the null (permuted (rare)  $P < 0.05$  and  
280 (common)  $P = 0.002$ ). While the expansion of unique clones in response to antigen exposure  
281 can explain the decreased sharing in the downsampled repertoire of older individuals, greater  
282 TCR $\beta$  overlap within the singleton repertoire of older individuals is consistent with the  
283 diminished TCR $\beta$  diversity in aging immune systems caused by decreased thymopoiesis (32,33).  
284 This is furthermore supported by the proportion of rare and common clones within older and  
285 younger individuals. Younger and older individuals have a comparable proportion of rare clones  
286 among their downsampled repertoire ( $p = 0.5$ , Wilcoxon test) (S8A Fig). However, among the 5000  
287 most abundant TCR $\beta$  rearrangements, age was significantly correlated with lower generation  
288 probabilities (S7B Fig, Spearman  $\rho = -0.37$ ,  $p = 8.6e-15$ ) and a higher proportion of rare TCR $\beta$   
289 clones (S8B Fig,  $p = 3.6e-10$ , Wilcoxon test). This suggests that antigen-specific TCR $\beta$  clones,  
290 including those with low generation probability, proliferate due to antigen exposure and thus  
291 are enriched in older individuals. In contrast, median generation probabilities of singletons  
292 increased significantly with age (S7C Fig, Spearman  $\rho = 0.17$ ,  $p = 0.0015$ ), and older individuals  
293 had a significantly lower proportion of rare singletons compared to younger individuals (S8C  
294 Fig,  $p = 0.03$ , Wilcoxon test). These age-dependent differences within the singleton repertoire  
295 support previous reports that a reduction in the thymus's production of naïve TCR $\beta$  clones  
296 diminishes diversity within this subset, and can explain the greater overlap of singletons among  
297 older individuals. Together, these findings support a model whereby antigen exposure to  
298 pathogens such as CMV during the life of an individual leads to expansion of mostly rare,  
299 private clones, while age related changes in the thymus reduce the complexity and diversity of  
300 singletons among older individuals.

301

### 302 **DISCUSSION**

303 The composition of an individual's TCR $\beta$  repertoire is the result of many forces, both biological  
304 and environmental (34). While several of these factors have been well characterized, their  
305 interaction within the context of HLA type has not been thoroughly explored. Here we looked at  
306 the extent to which HLA type, antigen exposure, and age impact the sharing of TCR $\beta$  clones  
307 between unrelated individuals. We assessed these factors within the context of TCR $\beta$   
308 generation probabilities to determine how clones of varying prevalence are affected. By



309 separately surveying clone sharing among singletons and high frequency clones, we  
310 distinguished between HLA-restricted selection vs. HLA-restricted expansion. Our data support  
311 a broad model of TCR $\beta$  proliferation wherein HLA allele sharing increases sharing of TCR $\beta$   
312 clones across all frequencies, while increased age correlates with a more public naïve TCR $\beta$   
313 repertoire and antigenic exposure results in a more private expanded TCR $\beta$  repertoire.

314 Consistent with previous work characterizing the diversity of the immune repertoire (10,11,14),  
315 our data reinforces that the TCR $\beta$  repertoire of an individual is predominantly private. Even  
316 when several HLA alleles are shared between two unrelated individuals, we see that over 98%  
317 of each repertoire is comprised of unique clones. Within the singleton repertoire, which best  
318 reflects the inherent diversity of the naïve repertoire, less than 1% of the repertoire is shared  
319 between individuals, demonstrating the high variability of VDJ somatic recombination. We  
320 additionally show that HLA zygosity of an individual does not strongly affect the overall diversity  
321 of their TCR $\beta$  repertoire. While previous work with a similar dataset found a correlation  
322 between HLA class I zygosity and decreased repertoire richness among CMV- individuals, that  
323 analysis quantified diversity with different metrics and did not control for sampling depth,  
324 which could impact the finding (30). One limitation of this cohort is that over half of the  
325 individuals are of European descent, and a more diverse cohort may have a  
326 different distribution of HLA zygosity. Nonetheless, these findings suggest that the space of  
327 potential TCR $\beta$  clones is diverse enough that the homozygosity of a person's HLA genotype does  
328 not affect the overall diversity of their repertoire.

329 The divergent allele advantage hypothesis suggests that more heterozygous HLA loci and  
330 greater evolutionarily divergence among HLA alleles leads to an increased number of antigens  
331 that can be presented to T cells by the MHC (21). It has been further shown that even within  
332 fully heterozygous individuals, evolutionary divergence of HLA alleles is positively correlated  
333 with the number of peptides predicted to be recognized by the TCR $\beta$  repertoire of an individual  
334 (16,22). As such, it is perhaps not surprising that HLA zygosity alone is not enough to alter the  
335 shape of the TCR $\beta$  repertoire. Future work incorporating phylogeny-aware or distance-based  
336 clustering of HLA alleles (16,35,36) could better assess the functional diversity of an individual's  
337 HLA alleles and thus the relationship between potential bound peptides and diversity. However,  
338 it is also important to note that decreased numbers of bound peptides may not translate to a  
339 decrease in the number of unique T cells generated, as HLA restriction during T-cell maturation  
340 functions independently of antigen exposure.

341 Despite the large inherent diversity of the TCR $\beta$  repertoire, comparisons between unrelated  
342 individuals always contain a portion of public clones. We show that individuals sharing more  
343 HLA alleles share more TCR $\beta$  clones, suggesting that HLA type impacts the specific T cells  
344 selected for maturation and consistent with HLA restriction during thymic selection. Previous  
345 work has also shown that public clones occur more frequently than would be expected by  
346 chance due to biases in VDJ recombination and indels (1,6,10,37). Our analyses support these  
347 findings, as individuals sharing no HLA alleles still share TCR $\beta$  clones. Moreover, we see a

348 stronger correlation between HLA sharing and the sharing of rare clones compared to the  
349 sharing of common clones, suggesting a background of easily generated clones while rare  
350 clones are more HLA restricted. Notably, even among commonly recombined clones, HLA  
351 restriction is significantly correlated with clone sharing, suggesting that convergent  
352 recombination alone cannot explain the prevalence of all public clones.

353 While high frequency clones may be shared between individuals after exposure to a common  
354 antigen, the lowest frequency clones within an individual should be largely antigen naïve. We  
355 demonstrate that the sharing of singleton clones between individuals is a function of both an  
356 individual's HLA genotype and age, consistent with previously observed patterns of HLA  
357 restriction and thymic involution, respectively. We see that the number of shared HLA alleles is  
358 positively correlated with the number of shared singletons between individuals, further  
359 supporting our assertion that sharing of TCR $\beta$  clones of all frequencies is influenced by HLA  
360 allele overlap. Additionally, our data showing that older individuals share more singleton clones  
361 than younger individuals is consistent with thymic involution resulting in decreased T-cell  
362 diversity (32). As such, our work highlights the importance of incorporating HLA genotype and  
363 age in models examining public clone sharing, as well as the important distinctions between the  
364 naïve and memory compartments. This work further supports the hypothesis that TCR $\beta$   
365 repertoires can be used to infer the HLA type of an individual (11), however age may be a  
366 confounding factor and including younger individuals in the training data may increase model  
367 specificity and sensitivity.

368 Finally, while there has been demonstrated success in the diagnostic potential of utilizing public  
369 antigen-specific clones, our work suggests a largely private expansion of TCR $\beta$  clones in  
370 response to CMV antigen exposure. While public TCR $\beta$  clones do exist, they may represent the  
371 minority of the overall response. We show that CMV exposure actually decreases overall clone  
372 sharing, regardless of the number of HLA alleles shared. This suggests that within a similar HLA  
373 context, clonal expansion after CMV exposure is largely private. By extending this analysis to  
374 include the age of each individual, as a proxy for continued pathogenic exposure, our data  
375 indicate that the expansion of private clones in response to antigen exposure is not unique to  
376 CMV. Older individuals have likely been exposed to a broader range of pathogens than younger  
377 individuals, shaping their TCR $\beta$  repertoires in an increasingly private manner as T cells specific  
378 to encountered antigens expand and remain in the memory compartment. Interestingly, work  
379 in identical twins has similarly shown predominantly private responses to common antigens  
380 across individuals with the same genetic background (38–40). These data underscore how  
381 finding public, antigen-specific clones is a difficult problem requiring large datasets. However,  
382 the individual nature of TCR $\beta$  repertoires provides utility in tracking clones within individuals  
383 over time or between individuals with allogeneic T-cell transplants. While posing a considerable  
384 computational challenge, important future work will include defining motifs or implementing  
385 clustering algorithms to identify TCR $\beta$  clones that bind the same antigen (36,41). Together, this  
386 work emphasizes the inherent diversity and private nature of human TCR $\beta$  repertoires, as well

387 as the importance of incorporating HLA genotypes into models predicting both public TCR $\beta$   
388 sharing and antigen-specific expansion.

389

## 390 **METHODS**

### 391 **Sample Details**

392 All samples analyzed in this study were previously published in Emerson et al. (11). Of the 666  
393 immunosequenced healthy adult PBMC repertoires, we included 426 individuals in this analysis.  
394 These individuals all have complete 4-digit HLA resolution at the 6 included HLA loci (HLA-A,  
395 HLA-B, HLA-C, HLA-DPA, HLA-DQB, HLA-DRB), CMV serotyping, and 200,000 or more productive  
396 templates sequenced. HLA typing and CMV serostatus testing was conducted at the time of  
397 sample collection. Additionally, 15 samples were removed due to unexpected sharing of high-  
398 frequency TCR $\beta$  clones. Of these 426 samples, we know the age at collection of 366 of the  
399 subjects who were thus included in the age-related analyses. Samples were computationally  
400 downsampled to 200,000 productive nucleotide templates with replacement to minimize  
401 skewing in the number of singletons. TCR $\beta$  functional identity was determined using V-family  
402 and J-gene, as those gave the most robust resolutions of TCR $\beta$  clones.

403

### 404 **Data Availability**

405 All immunosequencing data underlying this paper can be downloaded and analyzed from  
406 Adaptive Biotechnologies' immuneACCESS database at  
407 <https://clients.adaptivebiotech.com/pub/Emerson-2017-NatGen>

408

### 409 **Calculating Simpson Clonality**

410 Simpson Clonality was defined as:  $Simpson\ clonality = \sqrt{\sum p_i^2}$  and was calculated on  
411 productive nucleotide rearrangements, where  $p_i$  is the proportional abundance of  
412 rearrangement  $i$  and  $N$  is the total number of rearrangements. Clonality values range from 0 to  
413 1 and describe the shape of the frequency distribution. Clonality values approaching 0 indicate  
414 a very even distribution of frequencies, whereas values approaching 1 indicate an increasingly  
415 asymmetric distribution in which a few clones are present at high frequencies.

416

### 417 **Calculating a Generation Probability Cutoff for Common and Rare Clone Distinction**

418 To calculate the generation probability, the TCR $\beta$  CDR3<sub>aa</sub> sequence, and if available V family  
419 and/or J gene, of each clone were input into OLGA, an algorithm that calculates generation

420 probabilities using a generative model for VDJ recombination (9). The unique rearrangements  
421 (a unique combination of TCR $\beta$  CDR3<sub>aa</sub>, V family, and J gene) from each sample were  
422 aggregated into a single data table and randomly shuffled. To optimize downstream  
423 computation efficiency, 31 sub tables (“chunks”) containing ~2 million rearrangements were  
424 created. Within each sub table, rearrangements occurring greater than once were labeled as  
425 “common” and those occurring once labeled as “rare.” The generation probabilities of each sub  
426 table’s common and rare clones were plotted as density curves and their points of intersection  
427 identified. The median value of the 31 intersection points was used downstream as the  
428 universal cutoff point to identify individual rearrangements as either common or rare.

429

### 430 **Statistical Analysis for Association Between HLA Allele Similarity and TCR $\beta$ Clone Sharing**

431 Mantel tests were conducted to evaluate the correlation between the pairwise number of  
432 shared HLA alleles and number of shared TCR $\beta$  clones. This correlation statistic is calculated by  
433 first creating two dissimilarity matrices, one for each variable being compared. The correlation  
434 between these two matrices is subsequently measured and then one matrix is repetitively  
435 shuffled to determine how often randomization of one matrix leads to increased correlation  
436 between the two matrices and thus variables. This permutation test evaluates the significance  
437 of the correlation between the observed dissimilarity matrices.

438 Linear mixed effects models were additionally created to measure the dependency of TCR $\beta$   
439 clone sharing on HLA allele sharing by generating an intercept and slope. The mixed effects  
440 model format was selected to incorporate the impact of the numerous different sample  
441 comparisons between separate individuals resulting in random effects altering the regression.

442 All statistical analyses and visualizations were conducted using R version 3.6 ([https://www.r-](https://www.r-project.org/)  
443 [project.org/](https://www.r-project.org/)).

444

### 445 **Creating Null Distribution of TCR $\beta$ Clone Sharing Across groups**

446 To test for the significance of the association between CMV or age with TCR $\beta$  clone sharing, we  
447 employed a permutation test in which the labels of interest were shuffled 1,000 times and the  
448 shuffled medians for each group were compared to the corresponding observed median. We  
449 then report the rank of each empirical median relative to the 1,000 shuffled medians and  
450 inclusive of the observed median, as well as the p-value for each group (S5A, S5B, S5C Figs).  
451 Rank values closer to 1000 signify that the observed median is greater than the permuted  
452 median in most or all of the permutations, while values closer to 0 indicate that the measured  
453 median was below most of the permuted medians. The p-value was determined as the number  
454 of permutations more extreme than the observed value plus 1, to be inclusive of the observed  
455 value, out of 1001 and multiplied by 2 to account for a two-sided test.

456

457 **ACKNOWLEDGEMENTS**

458 We would like to thank all members of the Adaptive Biotechnologies Computational Biology  
459 Group who provided valuable insights during the project development and data analysis, in  
460 particular Erik Yusko, Bryan Howie, and Marissa Vignali.

461

462 **AUTHOR CONTRIBUTIONS**

463 SAJ and SLS performed computational analysis and wrote the manuscript. RMG performed  
464 computational analysis and edited the text. JAR performed computational analysis. HSR and  
465 PAF supervised the study and edited the manuscript.

466

467 **DISCLOSURES**

468 SAJ, SLS, RMG, HSR, and PAF have a financial interest in Adaptive Biotechnologies. JAR is a  
469 former employee of Adaptive Biotechnologies.

470

471 **REFERENCES**

- 472 1. Robins HS, Campregher PV, Srivastava SK, Wachter A, Turtle CJ, Khsai O, et al. Comprehensive  
473 assessment of T-cell receptor beta-chain diversity in alphabeta T cells. *Blood*. 2009 Nov  
474 5;114(19):4099–107.
- 475 2. Huppa JB, Davis MM. T-cell-antigen recognition and the immunological synapse. *Nat Rev Immunol*.  
476 2003;3(12):973–83.
- 477 3. Kirsch I, Vignali M, Robins H. T-cell receptor profiling in cancer. *Mol Oncol*. 2015 Dec;9(10):2063–70.
- 478 4. Robins HS, Srivastava SK, Campregher PV, Turtle CJ, Andriesen J, Riddell SR, et al. Overlap and  
479 effective size of the human CD8+ T-cell receptor repertoire. *Sci Transl Med*. 2010 Sep  
480 1;2(47):47ra64.
- 481 5. Yates A. Theories and Quantification of Thymic Selection. *Front Immunol* [Internet]. 2014 [cited  
482 2020 Oct 23];5. Available from:  
483 <https://www.frontiersin.org/articles/10.3389/fimmu.2014.00013/full>
- 484 6. Pogorelyy MV, Minervina AA, Chudakov DM, Mamedov IZ, Lebedev YB, Mora T, et al. Method for  
485 identification of condition-associated public antigen receptor sequences. Chakraborty AK, editor.  
486 *eLife*. 2018 Mar 13;7:e33050.
- 487 7. Madi A, Shifrut E, Reich-Zeliger S, Gal H, Best K, Ndifon W, et al. T-cell receptor repertoires share a  
488 restricted set of public and abundant CDR3 sequences that are associated with self-related  
489 immunity. *Genome Res*. 2014 Oct;24(10):1603–12.

- 490 8. DeWitt WS III, Smith A, Schoch G, Hansen JA, Matsen FA IV, Bradley P. Human T cell receptor  
491 occurrence patterns encode immune history, genetic background, and receptor specificity. Walczak  
492 AM, Chakraborty AK, Elhanati Y, Gerritsen B, editors. *eLife*. 2018 Aug 28;7:e38358.
- 493 9. Sethna Z, Elhanati Y, Callan CG, Walczak AM, Mora T. OLGA: fast computation of generation  
494 probabilities of B- and T-cell receptor amino acid sequences and motifs. *Bioinformatics*. 2019 Sep  
495 1;35(17):2974–81.
- 496 10. Elhanati Y, Sethna Z, Callan CG, Mora T, Walczak AM. Predicting the spectrum of TCR repertoire  
497 sharing with a data-driven model of recombination. *Immunol Rev*. 2018 Jul;284(1):167–79.
- 498 11. Emerson RO, DeWitt WS, Vignali M, Gravley J, Hu JK, Osborne EJ, et al. Immunosequencing identifies  
499 signatures of cytomegalovirus exposure history and HLA-mediated effects on the T cell repertoire.  
500 *Nat Genet*. 2017 May;49(5):659–65.
- 501 12. DeWitt WS, Emerson RO, Lindau P, Vignali M, Snyder TM, Desmarais C, et al. Dynamics of the  
502 cytotoxic T cell response to a model of acute viral infection. *J Virol*. 2015 Apr;89(8):4517–26.
- 503 13. Snyder TM, Gittelman RM, Klinger M, May DH, Osborne EJ, Taniguchi R, et al. Magnitude and  
504 Dynamics of the T-Cell Response to SARS-CoV-2 Infection at Both Individual and Population Levels.  
505 *medRxiv*. 2020 Sep 17;2020.07.31.20165647.
- 506 14. Venturi V, Chin HY, Asher TE, Ladell K, Scheinberg P, Bornstein E, et al. TCR  $\beta$ -Chain Sharing in  
507 Human CD8+ T Cell Responses to Cytomegalovirus and EBV. *J Immunol*. 2008 Dec 1;181(11):7853–  
508 62.
- 509 15. Britanova OV, Shugay M, Merzlyak EM, Staroverov DB, Putintseva EV, Turchaninova MA, et al.  
510 Dynamics of Individual T Cell Repertoires: From Cord Blood to Centenarians. *J Immunol*. 2016 Jun  
511 15;196(12):5005–13.
- 512 16. Chowell D, Krishna C, Pierini F, Makarov V, Rizvi NA, Kuo F, et al. Evolutionary divergence of HLA  
513 class I genotype impacts efficacy of cancer immunotherapy. *Nat Med*. 2019 Nov;25(11):1715–20.
- 514 17. Wall DA, Krueger J. Chimeric antigen receptor T cell therapy comes to clinical practice. *Curr Oncol*.  
515 2020 Apr;27(Suppl 2):S115–23.
- 516 18. Porter DL, Levine BL, Kalos M, Bagg A, June CH. Chimeric Antigen Receptor–Modified T Cells in  
517 Chronic Lymphoid Leukemia. *N Engl J Med*. 2011 Aug 25;365(8):725–33.
- 518 19. Nakamura T, Shirouzu T, Nakata K, Yoshimura N, Ushigome H. The Role of Major Histocompatibility  
519 Complex in Organ Transplantation- Donor Specific Anti-Major Histocompatibility Complex  
520 Antibodies Analysis Goes to the Next Stage -. *Int J Mol Sci [Internet]*. 2019 Sep 13 [cited 2020 Nov  
521 6];20(18). Available from: <https://www.ncbi.nlm.nih.gov/pmc/articles/PMC6769817/>
- 522 20. Bertaina A, Andreani M. Major Histocompatibility Complex and Hematopoietic Stem Cell  
523 Transplantation: Beyond the Classical HLA Polymorphism. *Int J Mol Sci [Internet]*. 2018 Feb 22 [cited  
524 2020 Nov 6];19(2). Available from: <https://www.ncbi.nlm.nih.gov/pmc/articles/PMC5855843/>

- 525 21. Wakeland EK, Boehme S, She JX, Lu C-C, McIndoe RA, Cheng I, et al. Ancestral polymorphisms of  
526 MHC class II genes: Divergent allele advantage. *Immunol Res.* 1990 Jun 1;9(2):115–22.
- 527 22. Divergent Allele Advantage at Human MHC Genes: Signatures of Past and Ongoing Selection |  
528 *Molecular Biology and Evolution* | Oxford Academic [Internet]. [cited 2020 Oct 26]. Available from:  
529 <https://academic.oup.com/mbe/article/35/9/2145/5034935>
- 530 23. Britanova OV, Putintseva EV, Shugay M, Merzlyak EM, Turchaninova MA, Staroverov DB, et al. Age-  
531 Related Decrease in TCR Repertoire Diversity Measured with Deep and Normalized Sequence  
532 Profiling. *J Immunol.* 2014 Mar 15;192(6):2689–98.
- 533 24. Qi Q, Liu Y, Cheng Y, Glanville J, Zhang D, Lee J-Y, et al. Diversity and clonal selection in the human T-  
534 cell repertoire. *Proc Natl Acad Sci U S A.* 2014 Sep 9;111(36):13139–44.
- 535 25. Lindau P, Mukherjee R, Gutschow MV, Vignali M, Warren EH, Riddell SR, et al. Cytomegalovirus  
536 Exposure in the Elderly Does Not Reduce CD8 T Cell Repertoire Diversity. *J Immunol.* 2019 Jan  
537 15;202(2):476–83.
- 538 26. Takada K, Takahama Y. Chapter Three - Positive-Selection-Inducing Self-Peptides Displayed by  
539 Cortical Thymic Epithelial Cells. In: Alt FW, editor. *Advances in Immunology* [Internet]. Academic  
540 Press; 2015 [cited 2020 Nov 2]. p. 87–110. Available from:  
541 <http://www.sciencedirect.com/science/article/pii/S0065277614000042>
- 542 27. Venturi V, Kedzierska K, Price DA, Doherty PC, Douek DC, Turner SJ, et al. Sharing of T cell receptors  
543 in antigen-specific responses is driven by convergent recombination. *Proc Natl Acad Sci.* 2006 Dec  
544 5;103(49):18691–6.
- 545 28. Jiang W, Kang L, Lu H-Z, Pan X, Lin Q, Pan Q, et al. Normal Values for CD4 and CD8 Lymphocyte  
546 Subsets in Healthy Chinese Adults from Shanghai. *Clin Diagn Lab Immunol.* 2004 Jul;11(4):811–3.
- 547 29. The naive T-cell receptor repertoire has an extremely broad distribution of clone sizes | *eLife*  
548 [Internet]. [cited 2020 Oct 26]. Available from: <https://elifesciences.org/articles/49900>
- 549 30. Krishna C, Chowell D, Gönen M, Elhanati Y, Chan TA. Genetic and environmental determinants of  
550 human TCR repertoire diversity. *Immun Ageing.* 2020 Sep 4;17(1):26.
- 551 31. Yoshida K, Cologne JB, Cordova K, Misumi M, Yamaoka M, Kyoizumi S, et al. Aging-related changes  
552 in human T-cell repertoire over 20years delineated by deep sequencing of peripheral T-cell  
553 receptors. *Exp Gerontol.* 2017 Oct 1;96:29–37.
- 554 32. Fulton RB, Varga SM. Effects of aging on the adaptive immune response to respiratory virus  
555 infections. *Aging Health.* 2009 Dec 1;5(6):775.
- 556 33. Palmer DB. The effect of age on thymic function. *Front Immunol.* 2013 Oct 7;4:316.
- 557 34. Brodin P, Davis MM. Human immune system variation. *Nat Rev Immunol.* 2017 Jan;17(1):21–9.
- 558 35. Grantham R. Amino acid difference formula to help explain protein evolution. *Science.* 1974 Sep  
559 6;185(4154):862–4.

- 560 36. Huang H, Wang C, Rubelt F, Scriba TJ, Davis MM. Analyzing the Mycobacterium tuberculosis immune  
561 response by T-cell receptor clustering with GLIPH2 and genome-wide antigen screening. *Nat*  
562 *Biotechnol.* 2020 Oct;38(10):1194–202.
- 563 37. Venturi V, Quigley MF, Greenaway HY, Ng PC, Ende ZS, McIntosh T, et al. A mechanism for TCR  
564 sharing between T cell subsets and individuals revealed by pyrosequencing. *J Immunol Baltim Md*  
565 *1950.* 2011 Apr 1;186(7):4285–94.
- 566 38. Pogorelyy MV, Minervina AA, Touzel MP, Sycheva AL, Komech EA, Kovalenko EI, et al. Precise  
567 tracking of vaccine-responding T cell clones reveals convergent and personalized response in  
568 identical twins. *Proc Natl Acad Sci U S A.* 2018 Dec 11;115(50):12704–9.
- 569 39. Brodin P, Jojic V, Gao T, Bhattacharya S, Angel CJL, Furman D, et al. Variation in the human immune  
570 system is largely driven by non-heritable influences. *Cell.* 2015 Jan 15;160(1–2):37–47.
- 571 40. Yu XG, Lichterfeld M, Williams KL, Martinez-Picado J, Walker BD. Random T-Cell Receptor  
572 Recruitment in Human Immunodeficiency Virus Type 1 (HIV-1)-Specific CD8+ T Cells from  
573 Genetically Identical Twins Infected with the Same HIV-1 Strain. *J Virol.* 2007 Nov 15;81(22):12666–  
574 9.
- 575 41. Dash P, Fiore-Gartland AJ, Hertz T, Wang GC, Sharma S, Souquette A, et al. Quantifiable predictive  
576 features define epitope specific T cell receptor repertoires. *Nature.* 2017 Jul 6;547(7661):89–93.

577



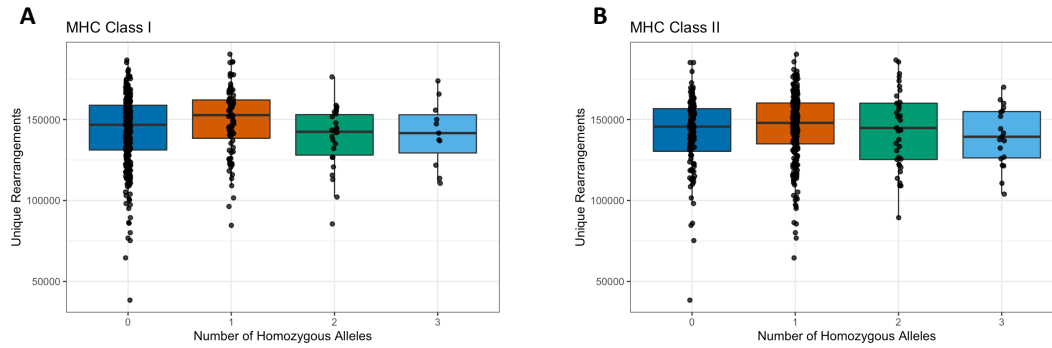

578

579 **Figure 1:**

580 Correlation of TCR $\beta$  repertoire richness and HLA zygosity. TCR $\beta$  richness was quantified as the  
581 number of unique nucleotide rearrangements in a repertoire computationally downsampled to  
582 200,000 productive templates. HLA zygosity at neither (A) class I loci nor (B) class II loci  
583 correlated with diversity (Spearman  $\rho = 0.035$ ,  $p = 0.47$  and  $\rho = 0.021$ ,  $p = 0.66$   
584 respectively).

585

586

587

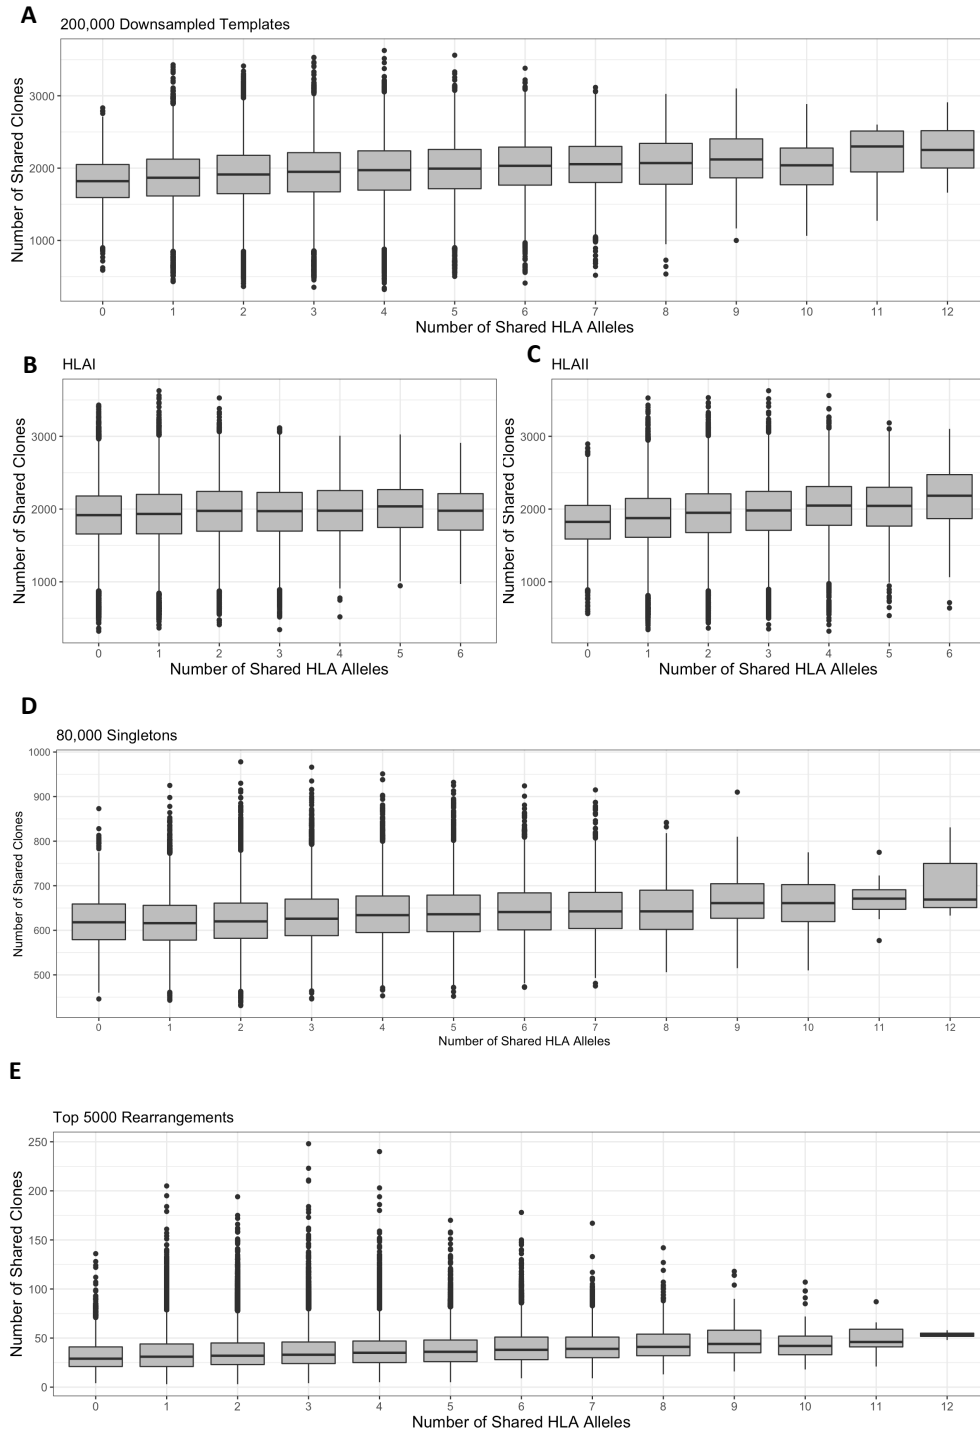

588

589 **Figure 2:**

590 TCR $\beta$  clone sharing is correlated with HLA allele sharing. Among repertoires computationally  
591 downsampled to 200,000 productive templates, clone sharing positively correlated with  
592 increased numbers of (A) shared HLA alleles overall, and of both HLA (B) class I and (C) class II  
593 alleles (A: Mantel rho = 0.17,  $p < 1e-3$ , linear mixed effects model slope = 14, intercept = 1884.  
594 B: Mantel rho = 0.07,  $p < 1e-3$ , linear mixed effects model slope = 9, intercept = 1920. C: Mantel  
595 rho = 0.19,  $p < 1e-3$ , linear mixed effects model slope = 21, intercept = 1881). (D) The number of  
596 singletons shared between two individuals was positively and significantly correlated with the  
597 number of HLA alleles shared (Mantel rho = 0.14,  $p < 1e-3$ , linear mixed effects model slope = 6,  
598 intercept = 613). (E) The number of clones shared among the top 5,000 unique rearrangements  
599 was positively and significantly correlated with the number of HLA alleles shared between two  
600 individuals (Mantel rho = 0.13,  $p < 1e-3$ , linear mixed effects model slope = 1.3, intercept = 34).

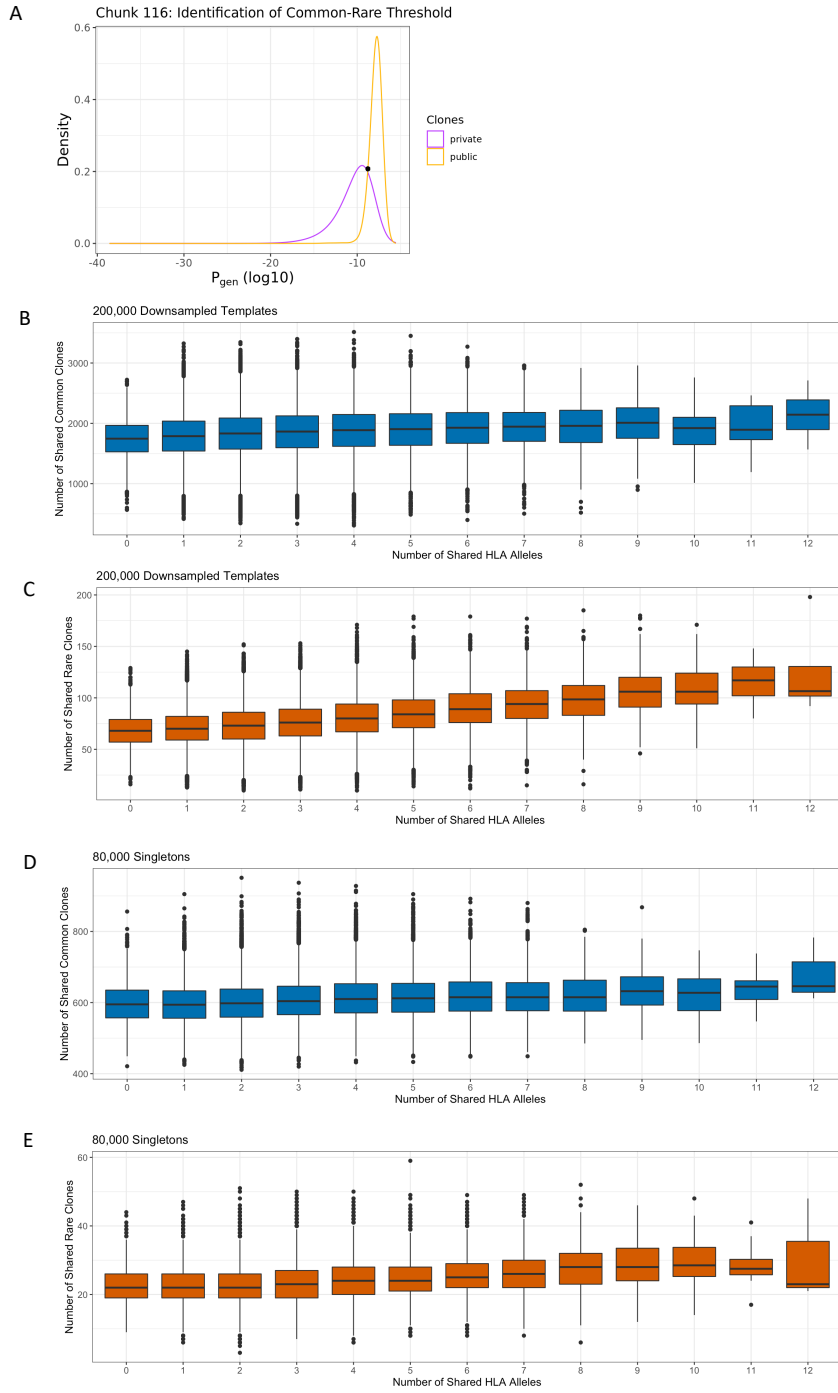

601

602 **Figure 3:**

603 TCR $\beta$  clone sharing among common and rare clones. Clones were classified as common versus  
604 rare by identifying a generation probability cutoff point between clones occurring once and  
605 those occurring more than once in 31 different “chunks” representing the entirety of TCR $\beta$   
606 rearrangements observed in the downsampled data. (A) Intersection point from a single  
607 representative “chunk.” The number of shared HLA alleles was significantly correlated with  
608 clone sharing among both (B) common (Mantel rho = 0.12,  $p < 1e-3$ ) and (C) rare clones (Mantel  
609 rho = 0.28,  $p < 1e-3$ ). Similarly, the number of shared HLA alleles was significantly correlated  
610 with sharing of singletons among (D) common (Mantel rho = 0.14,  $p < 1e-3$ ) and (E) rare  
611 (Mantel rho = 0.18,  $p < 1e-3$ ) clones.

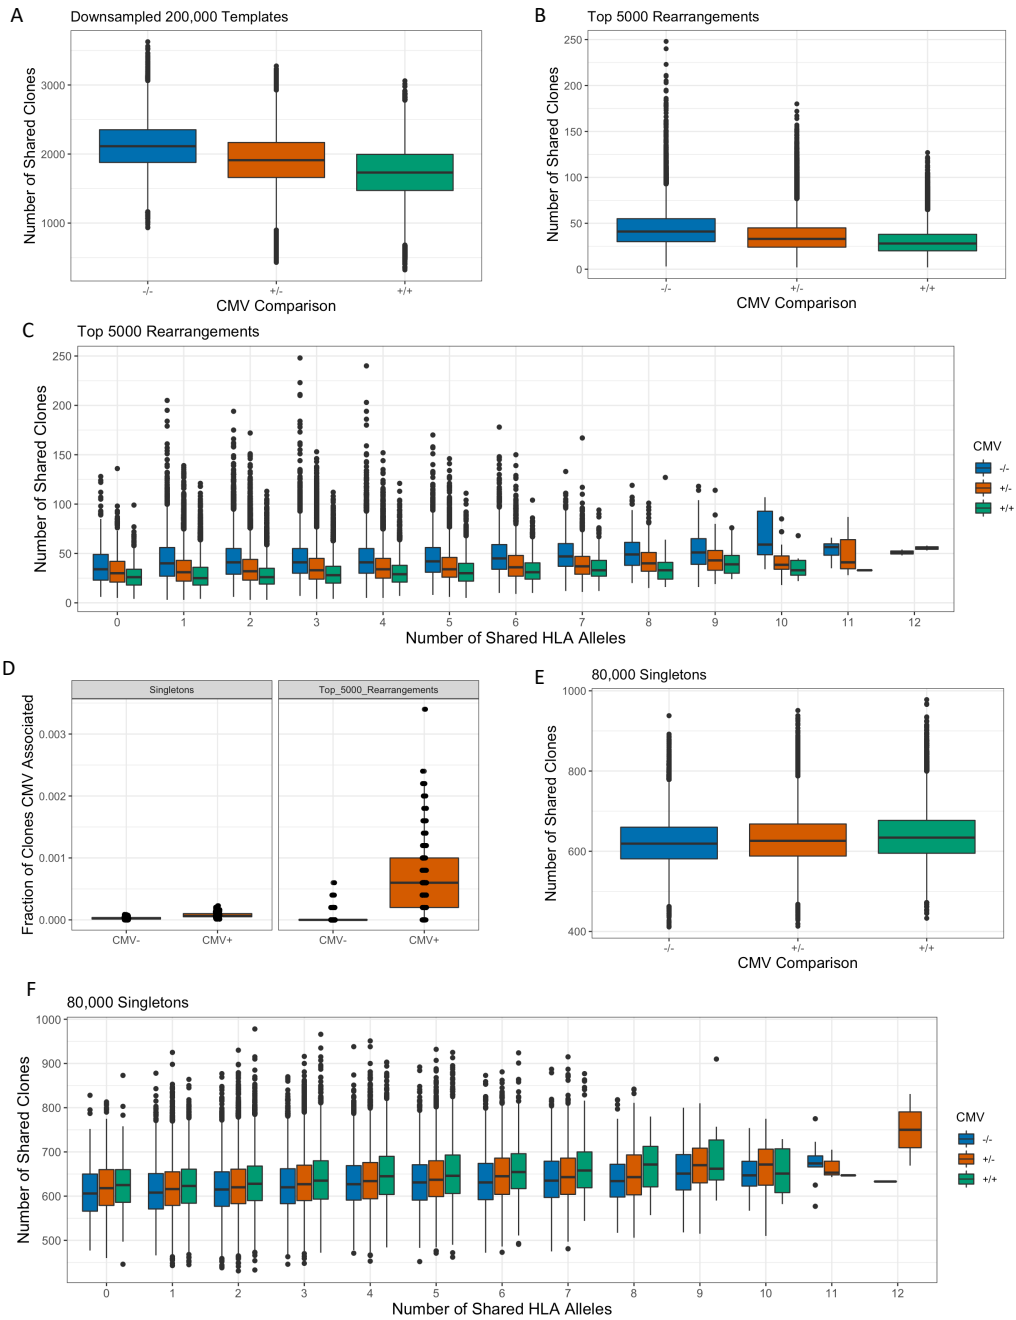

612

613 **Figure 4:**

614 CMV status influences TCR $\beta$  clone sharing. (A) CMV- individuals shared more TCR $\beta$  clones within  
615 their downsampled repertoires compared to CMV+ individuals. (B) CMV- individuals shared  
616 more of their top 5,000 rearrangements compared to CMV+ individuals. (C) CMV- individuals  
617 shared more top rearrangements than CMV+ individuals do, regardless of the number of HLA  
618 alleles shared. (D) There was a greater fraction of clones in CMV+ individuals that were among  
619 the 164 CMV associated clones identified in Emerson et al. compared to CMV- individuals,  
620 among both singletons and top 5,000 rearrangements (Wilcoxon rank sum tests,  $p < 2.2e-16$  for  
621 both). (E) There was a similar number of singletons shared among CMV- and CMV+ individuals.  
622 (F) CMV+ individuals with a common number of shared HLA alleles shared slightly more  
623 singletons than CMV- individuals do.

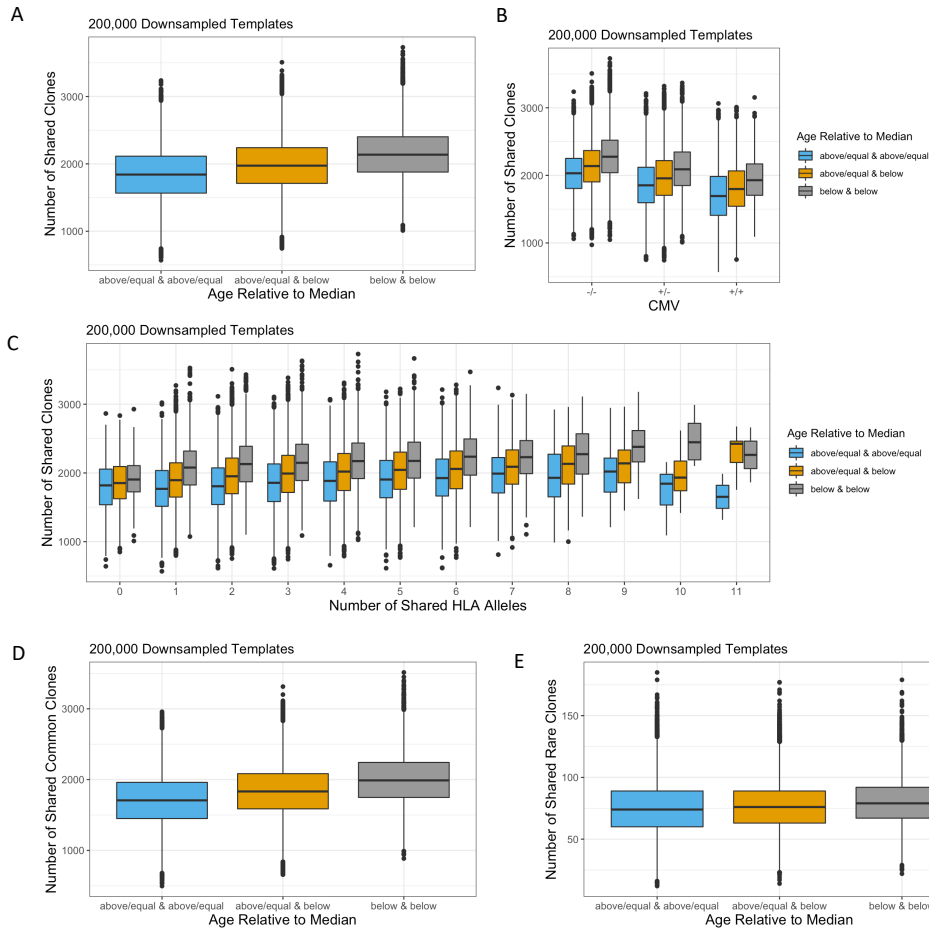

624

625 **Figure 5:**

626 Impact of age on TCR $\beta$  clone sharing. Individuals were stratified by the median age (42). (A)  
627 Younger individuals shared more clones in their downsampled repertoires compared to older  
628 individuals, independent of (B) CMV exposure and (C) shared HLA alleles. Among (D) common  
629 and (E) rare clones, younger individuals shared more clones in their downsampled repertoires  
630 than older individuals.



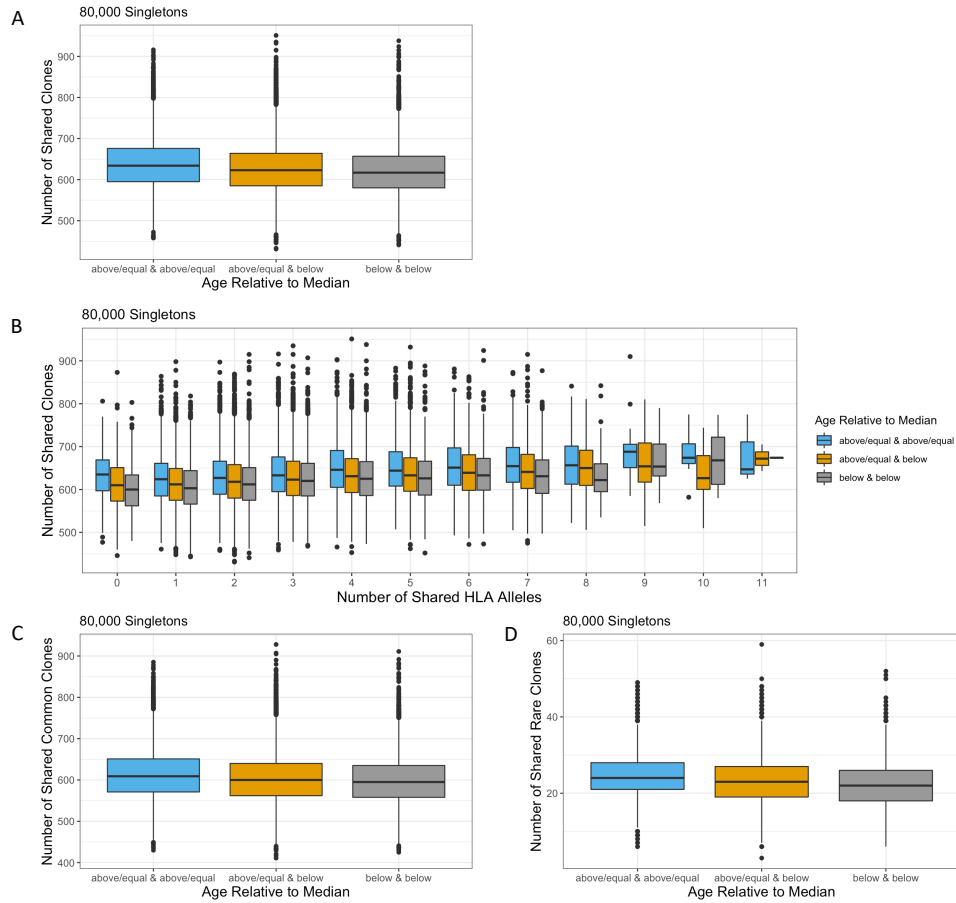

631

632 **Figure 6:**

633 Impact of age on sharing of singleton TCR $\beta$  clones. Individuals were stratified by the median age  
634 (42). (A) Older individuals shared more singletons than younger individuals. (B) Age impacted  
635 the sharing of singletons regardless of the number of HLA alleles. Older individuals shared more  
636 (C) common and (D) rare singletons than younger individuals.

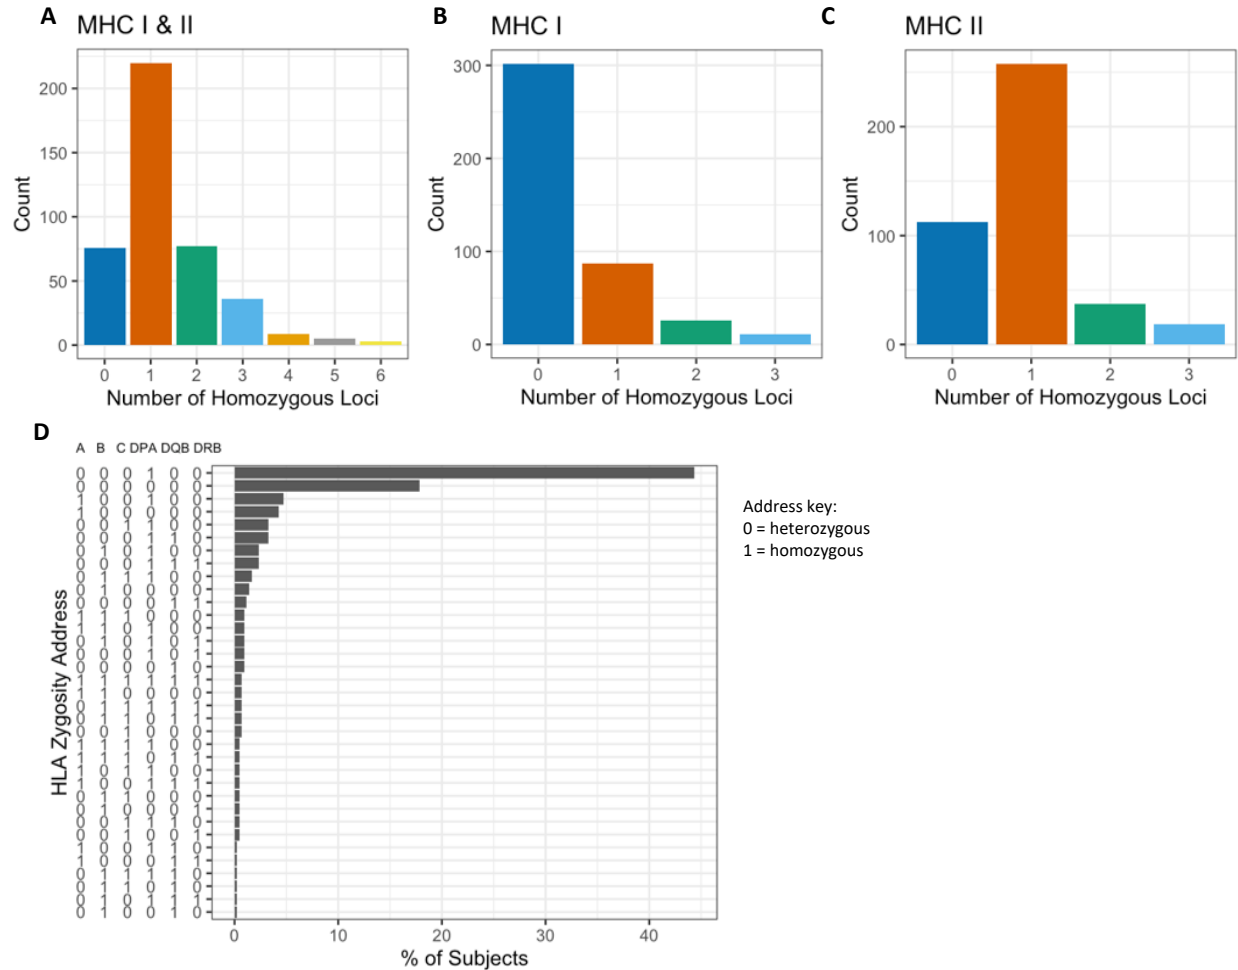

637

638 **Figure Supplement 1:**

639 Distribution of HLA alleles in study cohort. (A) Count of individuals, among the cohort of 426,  
 640 based on number of homozygous HLA loci. (B) Count of individuals based on number of  
 641 homozygous HLA class I loci: HLA-A, HLA-B, HLA-C. Most individuals are heterozygous at all HLA  
 642 Class I loci. (C) Count of individuals based on number of homozygous HLA class II loci: HLA-  
 643 DPA1, HLA-DQB1, HLA-DRB1. (D) The distribution of individuals with each combination of  
 644 homozygous loci. 44% of individuals in this cohort are homozygous at HLA-DPA1.

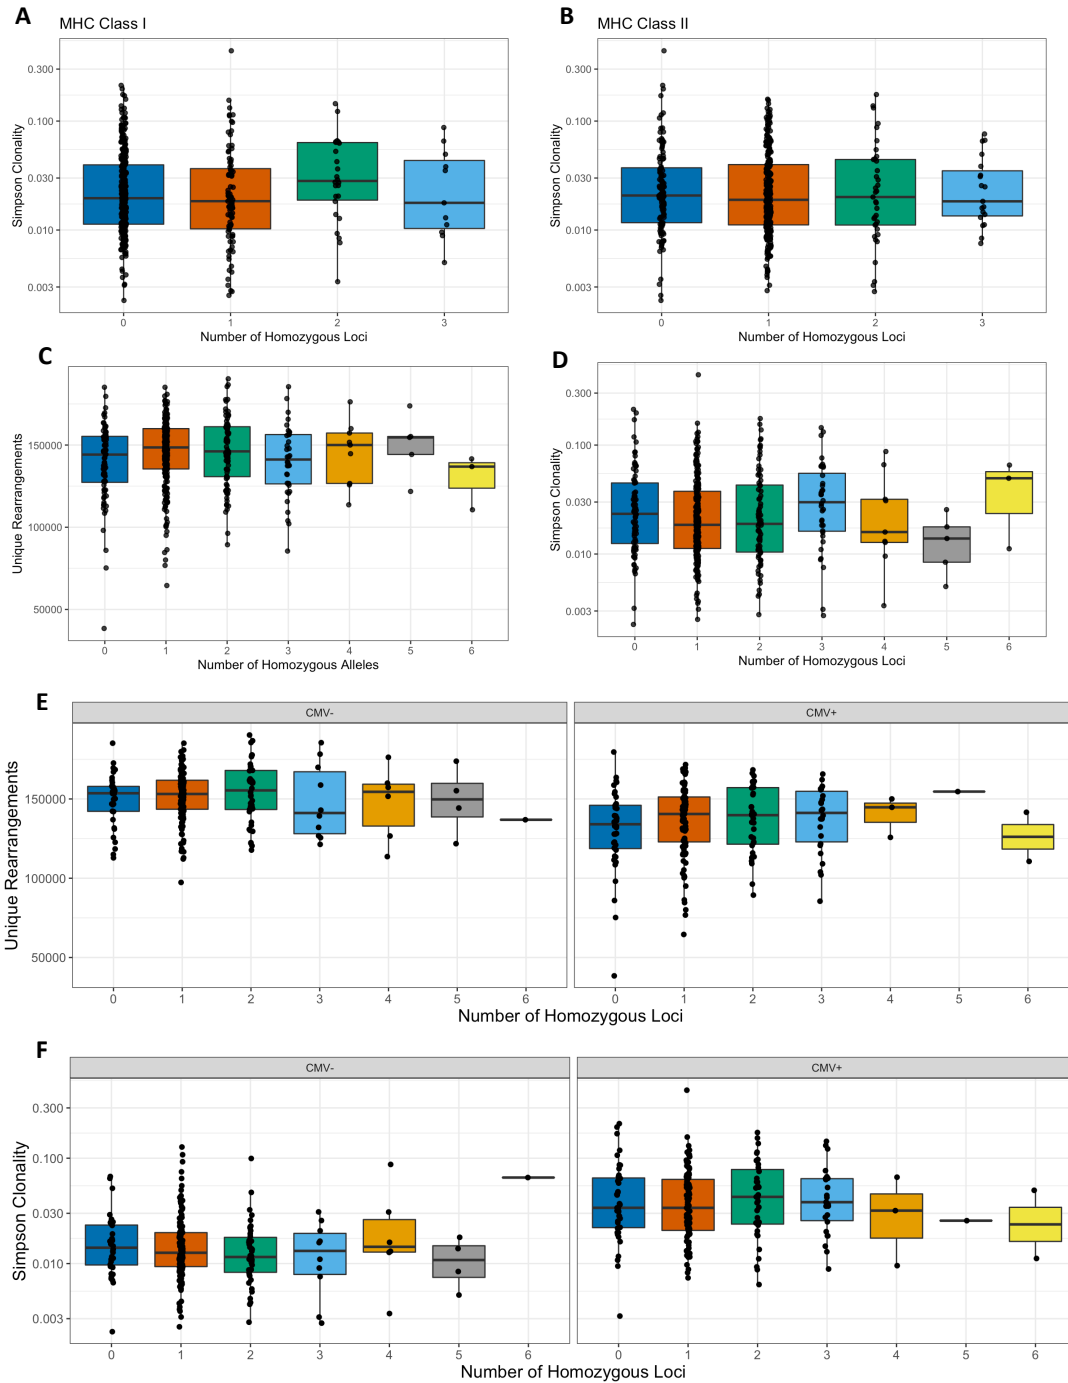

645

646 **Figure Supplement 2:**

647 Impact of HLA zygosity on repertoire richness and clonality. HLA zygosity at neither (A) class I  
648 loci (Spearman rho = 0.011, p = 0.08) nor (B) class II loci were correlated with Simpson clonality  
649 (-0.023, p = 0.64). Overall, HLA zygosity in this cohort was not correlated with (C) richness  
650 (Spearman rho = 0.026, p = 0.60) or (D) Simpson clonality (Spearman rho = 0.0005, p = 0.99). (E)  
651 HLA zygosity was not correlated with richness among CMV- individuals (Spearman rho = 0.018,  
652 p = 0.79) or CMV+ individuals (Spearman rho = 0.086, p = 0.23). (F) HLA zygosity was not  
653 correlated with Simpson clonality among CMV- individuals (Spearman rho = -0.064, p = 0.34) or  
654 CMV+ individuals (Spearman rho = 0.023, p = 0.75).

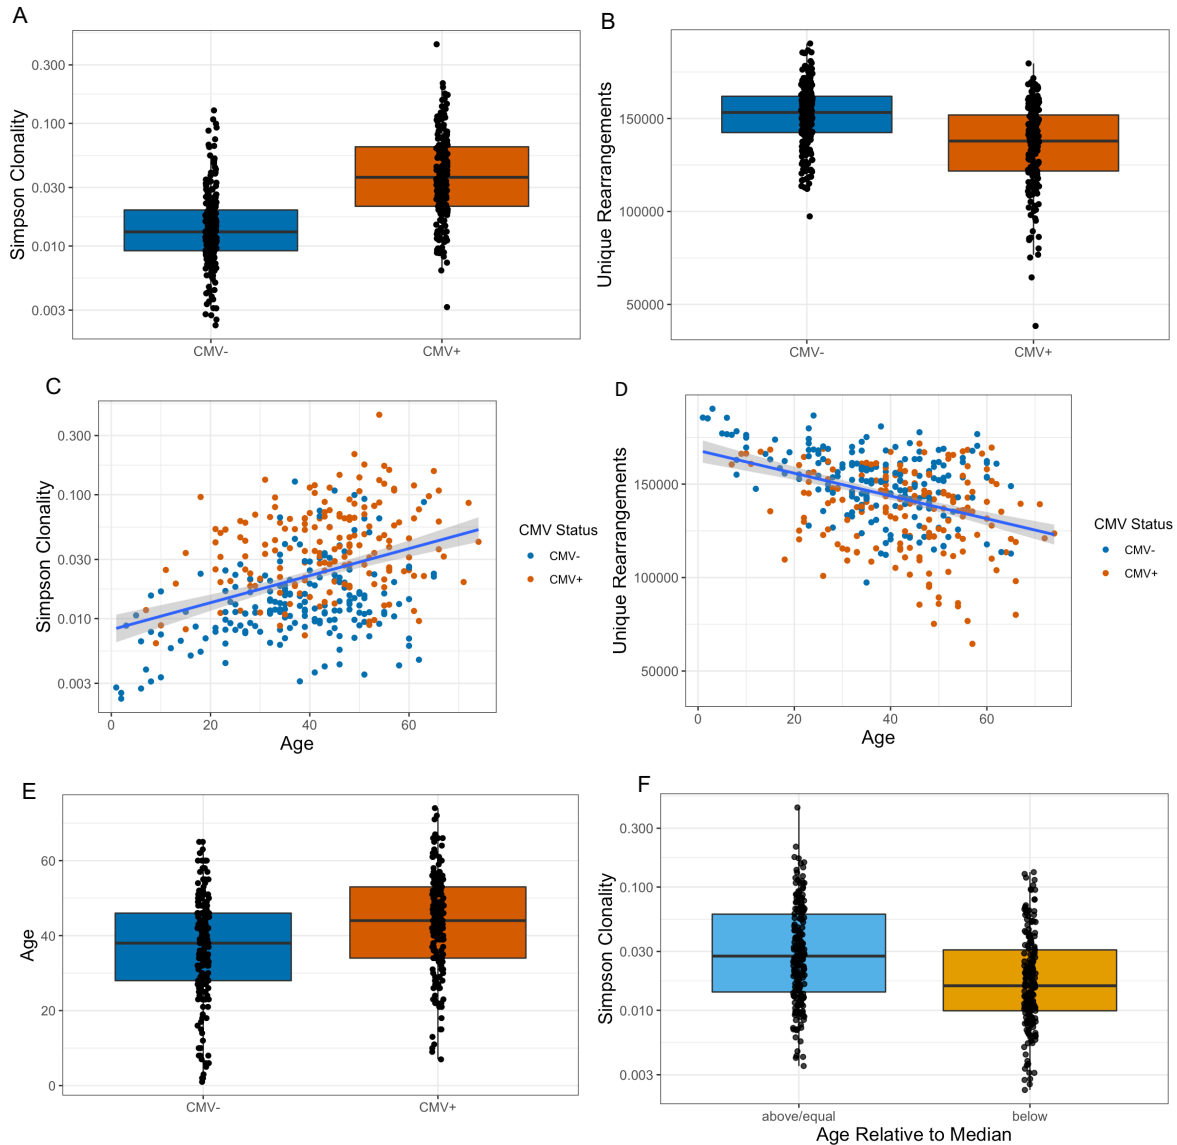

655

656 **Figure Supplement 3:**

657 Impact of age and CMV status on repertoire clonality and richness. CMV+ Individuals had  
658 significantly (A) higher Simpson clonality (Wilcoxon rank sum test,  $p < 2.2e-16$ ) and (B) lower  
659 richness (Wilcoxon rank sum test,  $p = 4.2e-14$ ) than CMV- individuals. (C) Simpson clonality was  
660 positively correlated with age (Spearman rho = 0.34,  $p = 3.4e-11$ ). (D) Repertoire richness was  
661 inversely correlated with age (Spearman rho = -0.35,  $p = 8.6e-12$ ). (E) CMV+ individuals were  
662 significantly older than CMV- individuals (Wilcoxon rank sum test,  $p = 2.9e-5$ ). (F) Subjects older  
663 than the overall median age had significantly greater Simpson clonality values than individuals  
664 that are younger than or equal to the median age (Wilcoxon rank sum test,  $p = 2.0e-7$ ).

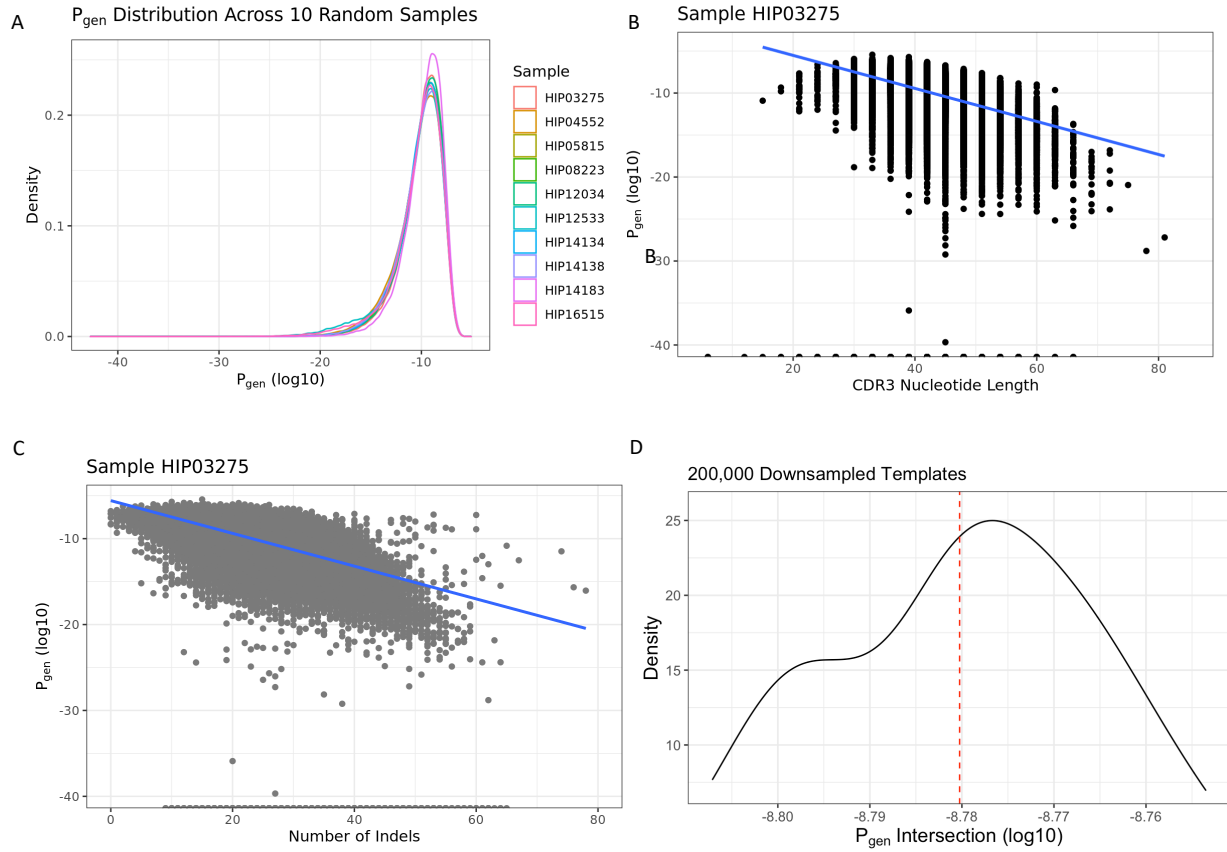

665

666

#### Figure Supplement 4:

667 Distributions of TCR $\beta$  generation probabilities. (A) Distribution of generative probabilities of  
668 TCR $\beta$  clones from 10 representative individuals. Generation probability was significantly  
669 correlated with (B) CDR3 nucleotide sequence length (Spearman rho = -0.48,  $p < 2.2e-16$ ) and  
670 (C) number of insertions and deletions (indels) (Spearman rho = -0.63,  $p < 2.2e-16$ ), figure from  
671 single representative repertoire. (D) Identification of a generation probability cutoff point to  
672 distinguish between common and rare clones. Generation probability intersection points from  
673 the 31 chunks ranged from -8.81 to -8.76 (log10 transformed values) and the median -8.78  
674 (1.66e-9) was selected as the cutoff point.

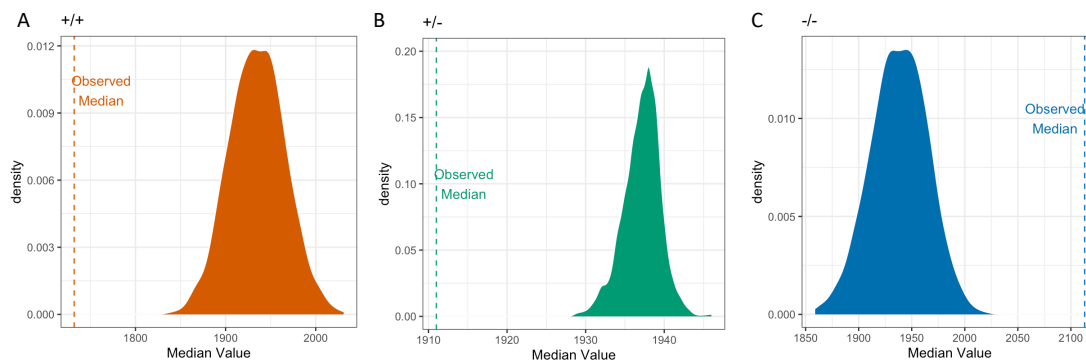

**D**

| Repertoire | CMV+/CMV+       | CMV+/CMV-        | CMV-/CMV-         |
|------------|-----------------|------------------|-------------------|
| 200,000 ds | 0.002 (rank 0)  | 0.002 (rank 0)   | 0.002 (rank 1000) |
| Top 5,000  | 0.002 (rank 0)  | 0.002 (rank 0)   | 0.002 (rank 1000) |
| singleton  | >0.05 (rank 89) | >0.05 (rank 906) | >0.05 (Rank 233)  |

**E**

| Repertoire                   | Above/equal & above/equal | Above/equal & below | Below & below     |
|------------------------------|---------------------------|---------------------|-------------------|
| 200,000 downsampled          | 0.002 (rank 0)            | 0.002 (rank 0)      | 0.002 (rank 1000) |
| 200,000 downsampled - common | 0.002 (rank 0)            | 0.002 (rank 0)      | 0.002 (rank 1000) |
| 200,000 downsampled - rare   | >0.05 (rank 76)           | 0.002 (rank 0)      | 0.003 (rank 997)  |
| singleton                    | 0.02 (rank 989)           | 0.002 (rank 0)      | 0.03 (rank 32)    |
| Singleton - common           | 0.02 (rank 988)           | 0.002 (rank 2)      | >0.05 (rank 70)   |
| Singleton - rare             | 0.002 (rank 1000)         | 0.002 (rank 0)      | 0.002 (rank 1000) |

675

676 **Figure Supplement 5:**

677 Determination of p-values by permutation tests. Within each set of pairwise comparisons, we  
678 compared the observed median value to the medians of 1,000 permuted comparisons and  
679 reported both rank and p-value for distribution indicated. (A) The observed median number of  
680 clones shared between CMV+ individuals was lower than the median of all shuffled  
681 comparisons, yielding a significant empirical p-value of 0.002. (B) The observed median number  
682 of clones shared between CMV+ and CMV- individuals was lower than the median of all  
683 shuffled comparisons, yielding a significant empirical p-value of 0.002. (C) The observed median  
684 number of clones shared between CMV- individuals was greater than the median of all shuffled  
685 comparisons, yielding a significant empirical p-value of 0.002. (D) Table containing the rank and  
686 empirical p-values of all clone sharing comparisons stratified by CMV serostatus. (E) Table  
687 containing the empirical p-values of all clone sharing comparisons stratified by age relative to  
688 median age (42).



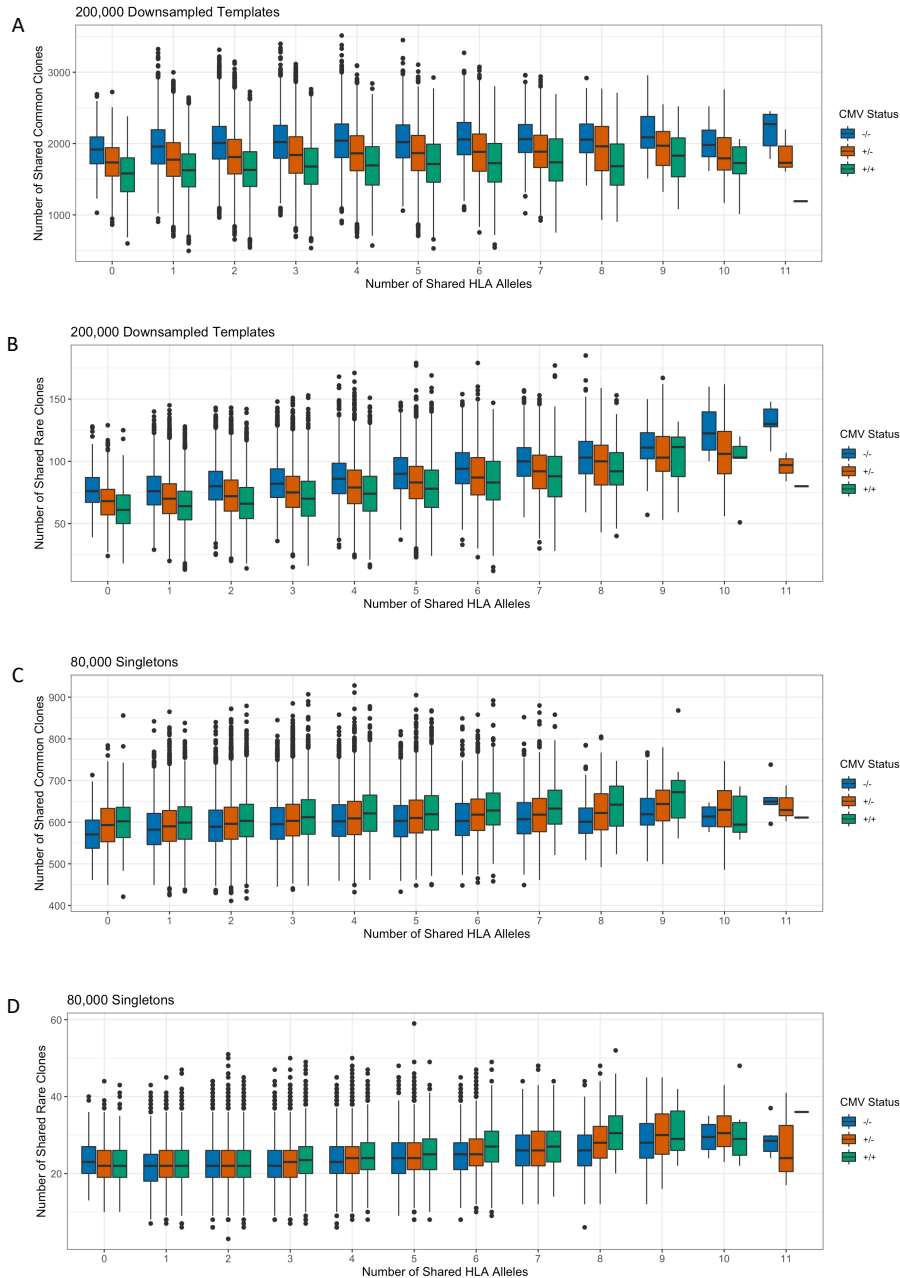

689

## 690 Figure Supplement 6:

691 Impact of shared HLA alleles and CMV status on the sharing of common and rare TCR $\beta$  clones.  
692 (A) Individuals that were both CMV- shared more common clones than individuals that were  
693 both CMV+, regardless of the number of HLA alleles shared. (B) Individuals that were both  
694 CMV- shared more rare clones than individuals that were both CMV+, regardless of the number  
695 of HLA alleles shared. Individuals that were both CMV+ shared more (C) common and (D) rare  
696 singletons than individuals that were both CMV-, regardless of the number of HLA alleles  
697 shared.

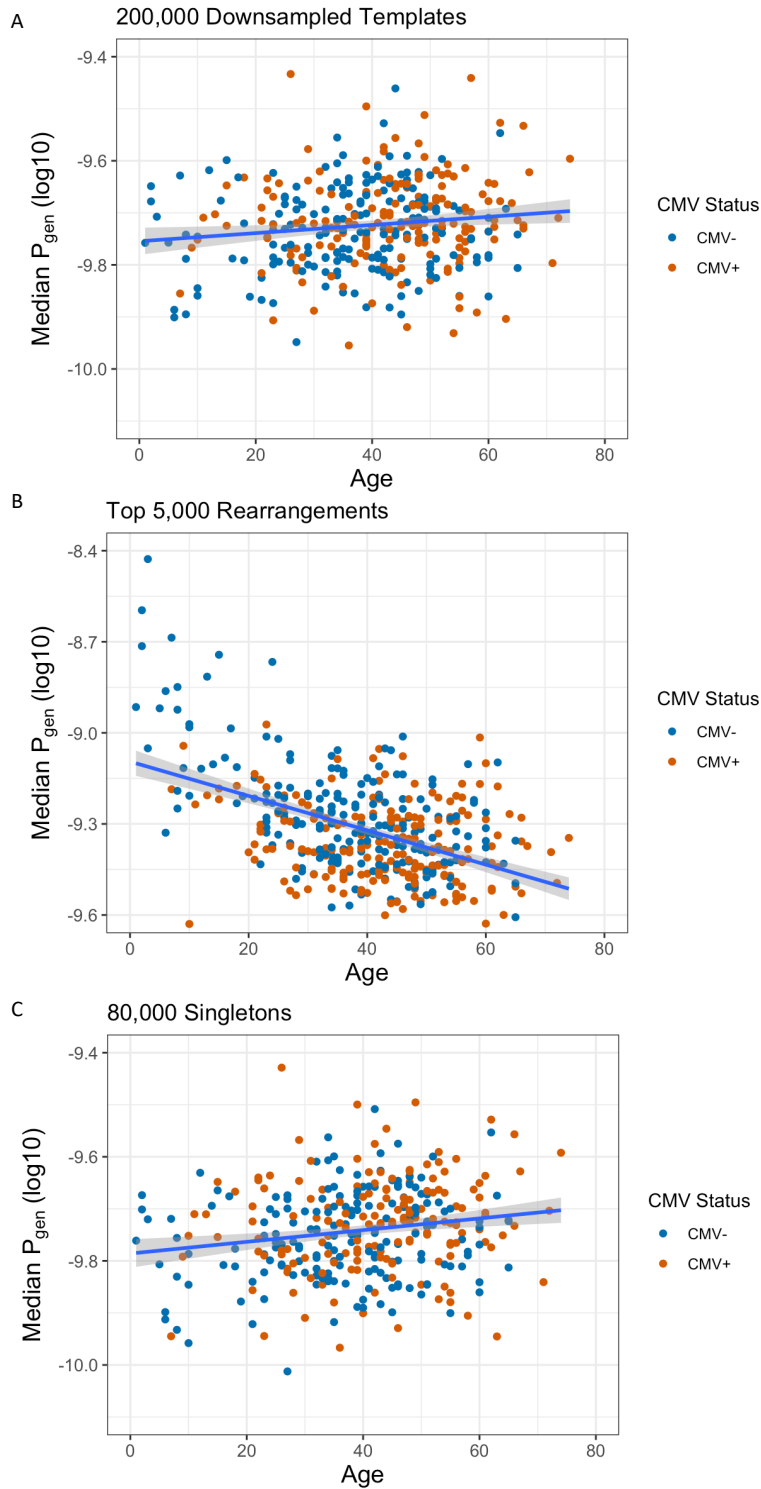

698

699 **Figure Supplement 7:**

700 Association between age and median TCR $\beta$  repertoire generation probability. Age was  
701 significantly correlated with (A) higher median generation probability within the downsampled  
702 repertoires (Spearman rho = 0.12, p = 0.022), (B) lower median generation probability within  
703 the top 5,000 clones (Spearman rho = -0.37, p = 8.6e-15), and (C) higher median generation  
704 probability within the singleton repertoires (Spearman rho = 0.17, p = 0.0015). Only subjects  
705 with available age data were included in this analysis.

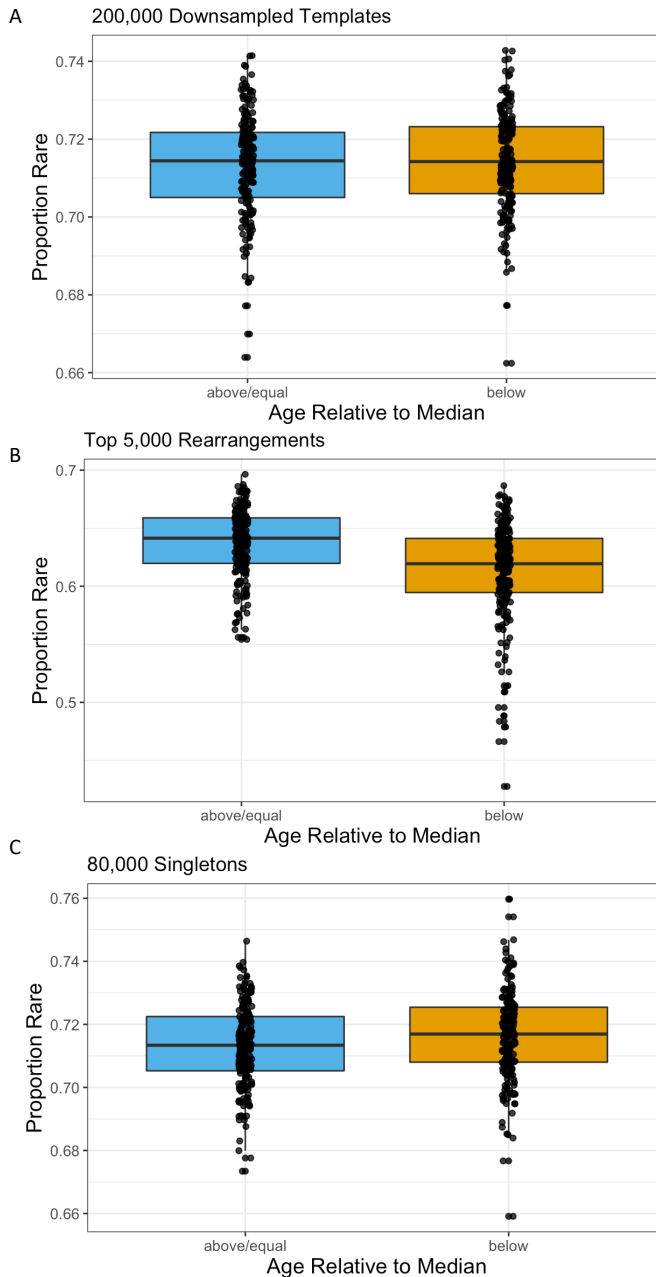

706

707

### Figure Supplement 8:

708

Proportion of rare TCR $\beta$  clones in repertoires. (A) There was not a significant difference in

709

proportion of rare clones between older and younger individuals within the downsampled

710

repertoires (Wilcoxon rank sum test,  $p = 0.5$ ).

711

Older individuals had a significantly greater

712

proportion of rare clones among their top 5,000 most abundant rearrangements than younger

713

individuals (Wilcoxon rank sum test,  $p = 3.6e-10$ ).

714

Older individuals had a significantly lower

proportion of rare singletons compared to younger individuals (Wilcoxon rank sum test,  $p = 3.0e-2$ ).
